# Supplementary material
Source: publisher figshare collection journal article supplement (https://acs.figshare.com/ndownloader/files/14005769)
Supplement: Supplementary file 1 [file 14005769]

# Supporting Information

## To Accompany

### Production of Carboxylic Acids from Aldehydes under Hydrothermal Conditions: A Kinetics Study of Benzaldehyde

Kristopher M. Fecteau<sup>a,\*</sup>, Ian R. Gould<sup>a</sup>, Christopher R. Glein<sup>b</sup>,  
Lynda B. Williams<sup>b</sup>, Hilairy E. Hartnett<sup>a,b</sup>, and Everett L. Shock<sup>a,b</sup>

<sup>a</sup>School of Molecular Sciences, Arizona State University, Tempe, AZ 85287, USA

<sup>b</sup>School of Earth and Space Exploration, Arizona State University, Tempe AZ 85287, USA

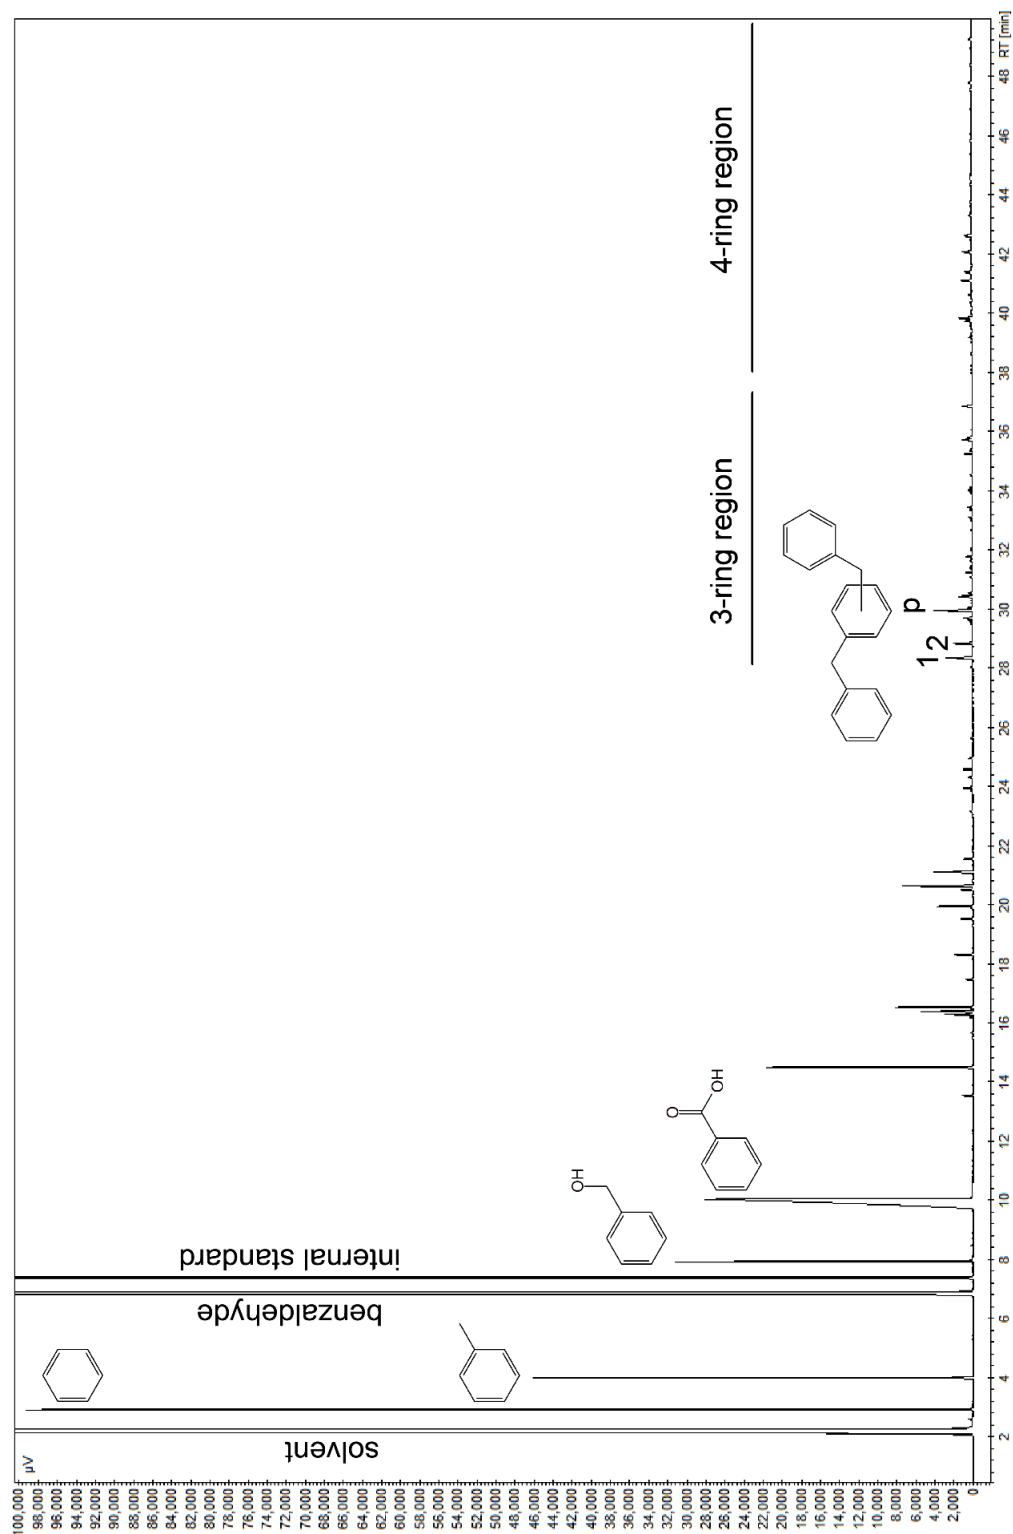

**Figure S1.** Typical chromatogram from benzaldehyde experiments (300°C, 0.1 molal starting concentration, 453 hours). Selected peaks are labeled with the structure of the analyte; isomers of dibenzylbenzene are labeled as dibenzylbenzene-1, dibenzylbenzene-2, or *p*-dibenzylbenzene (*i.e.*, 1,4-dibenzylbenzene) corresponding to Table 8. Approximate three-ring and four-ring regions are indicated with horizontal bars.

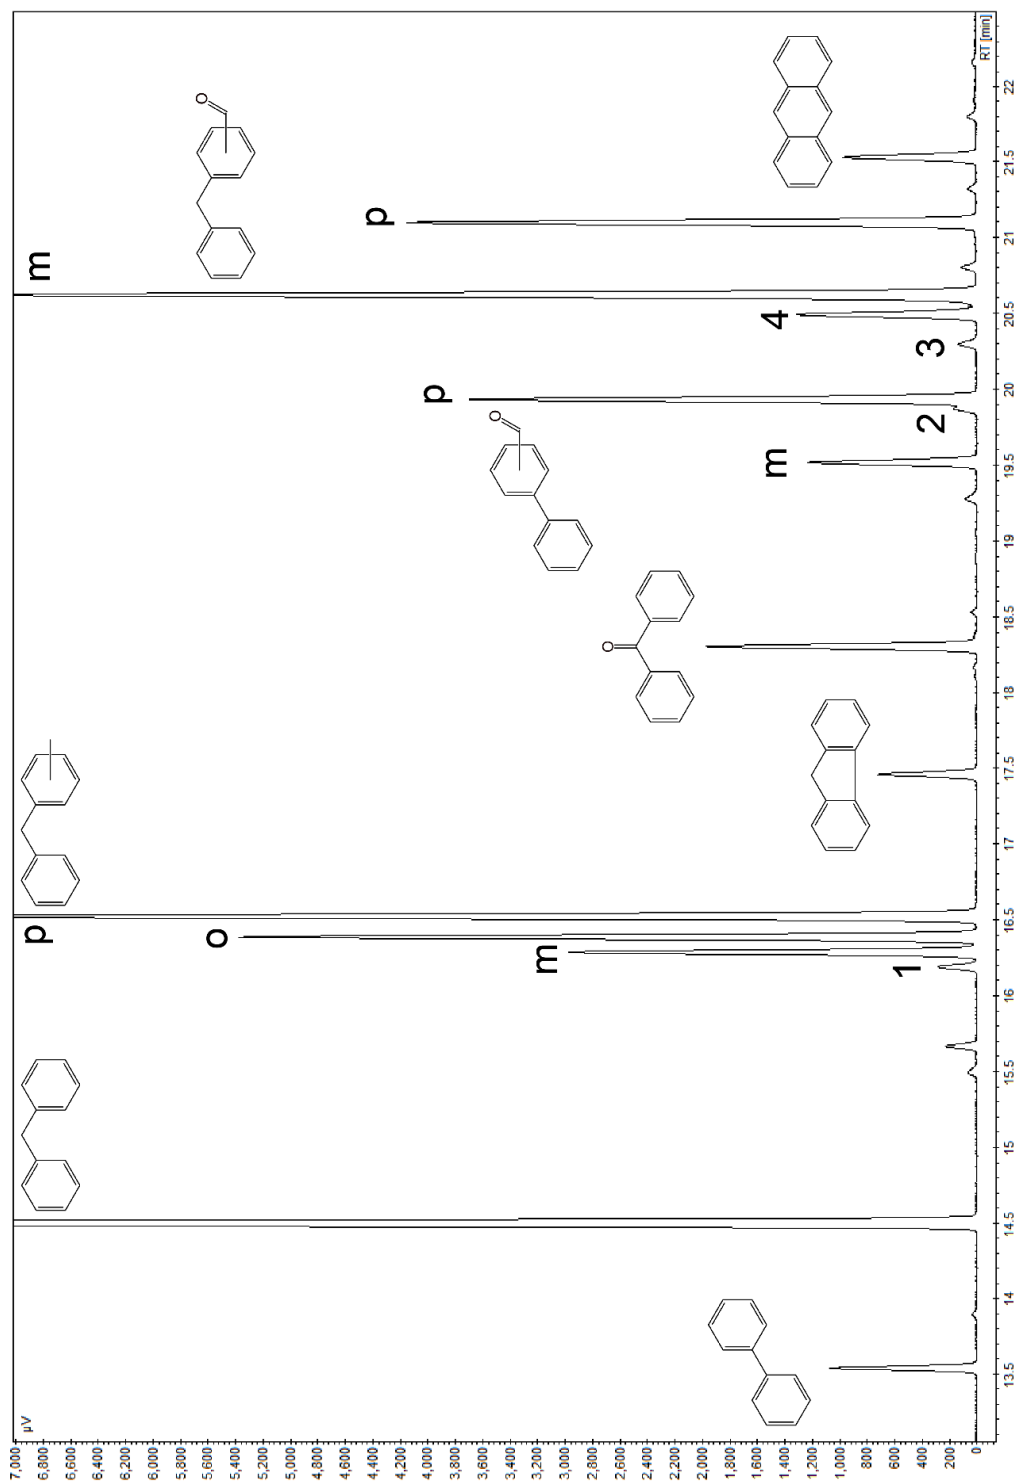

**Figure S2.** Two-ring region of chromatogram in Figure S1 with the structure of identified analytes indicated. Isomers are labeled as *o*, *m*, or *p* (i.e., *ortho*, *meta*, or *para*). Numbered peaks are as follows: 1, bibenzyl; 2, *trans*-stilbene; 3, phenylacetophenone; 4, 9-fluorenone.
